# Supplementary material for: Influence of Heat Treatment on the Corrosion Behavior of Electrodeposited CoCrFeMnNi High-Entropy Alloy Thin Films
Source: MDPI journal article supplement (doi:10.3390/coatings12081108), 2022-08-03
Supplement: s1 [file s1]

# Supplementary Materials: Influence of Heat Treatment on the Corrosion Behavior of Electrodeposited CoCrFeMnNi High-Entropy Alloy Thin Films

Ana-Maria Julieta Popescu <sup>1</sup>, Florina Branzoi <sup>1</sup>, Marian Burada <sup>2</sup>, Irina Atkinson <sup>1</sup>, Ionut Constantin <sup>1</sup>, Jose Calderon Moreno <sup>1</sup>, Florin Miculescu <sup>3</sup>, Dumitru Mitrica <sup>2</sup>, Ioana-Cristina Badea <sup>2</sup>, Mihai Tudor Olaru <sup>2</sup> and Virgil Constantin <sup>1,\*</sup>

- <sup>1</sup> Laboratory of Electrochemistry and Corrosion, “Ilie Murgulescu” Institute of Physical Chemistry—IPC, 202 Splaiul Independentei, 060021 Bucharest, Romania; popescuamj@yahoo.com (A.-M.J.P.); fbrinzoi@chimfiz.icf.ro (F.B.); irinaatkinson@yahoo.com (I.A.); dr\_ing\_constantin@yahoo.com (I.C.); josecalderonmoreno@yahoo.com (J.C.M.)
  - <sup>2</sup> National R&D Institute for Nonferrous and Rare Metals—IMNR, 102 Biruintei Blvd., 077145 Pantelimon, Romania; mburada@imnr.ro (M.B.); dmitrica@imnr.ro (D.M.); cristina.banica@imnr.ro (I.-C.B.); o.mihai@imnr.ro (M.T.O.)
  - <sup>3</sup> Department of Metallic Materials Science, Physical Metallurgy, University Politehnica of Bucharest, 313 Splaiul Independentei, J Building, District 6, 060042 Bucharest, Romania; f\_miculescu@yahoo.com
- \* Correspondence: virgilconstantin@yahoo.com

**Citation:** Popescu, A.-M.J.; Branzoi, F.; Burada, M.; Atkinson, I.; Constantin, I.; Moreno, J.C.; Miculescu, F.; Mitrica, D.; Badea, I.-C.; Olaru, M.T.; et al. Influence of Heat Treatment on the Corrosion Behavior of Electrodeposited CoCrFeMnNi High-Entropy Alloy Thin Films. *Coatings* **2022**, *12*, 1108. <https://doi.org/10.3390/coatings12081108>

Academic Editor: Heping Li

Received: 23 June 2022

Accepted: 1 August 2022

Published: date

**Publisher’s Note:** MDPI stays neutral with regard to jurisdictional claims in published maps and institutional affiliations.

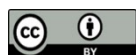

**Copyright:** © 2022 by the authors. Submitted for possible open access publication under the terms and conditions of the Creative Commons Attribution (CC BY) license (<https://creativecommons.org/licenses/by/4.0/>).

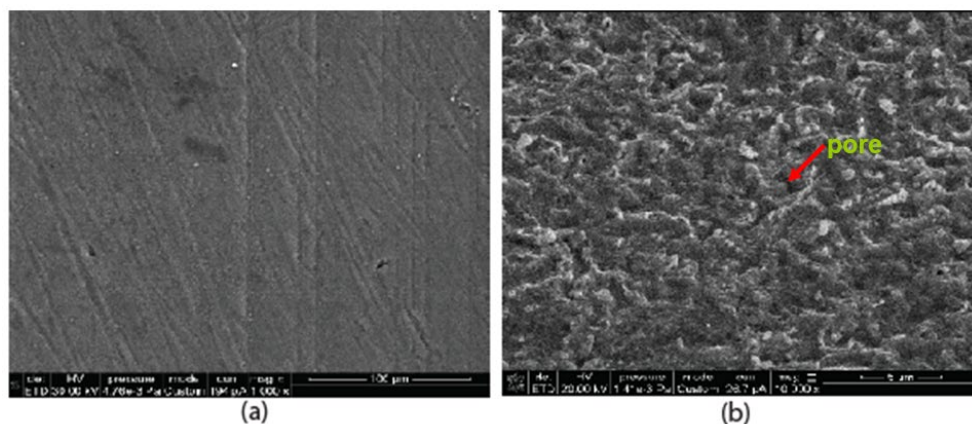

**Figure S1.** SEM morphology of the equimolar film CoCrFeMnNi electrodeposited and heat treated, sample 1HT: (a)  $\times 1,000$ ; (b)  $\times 10,000$ .

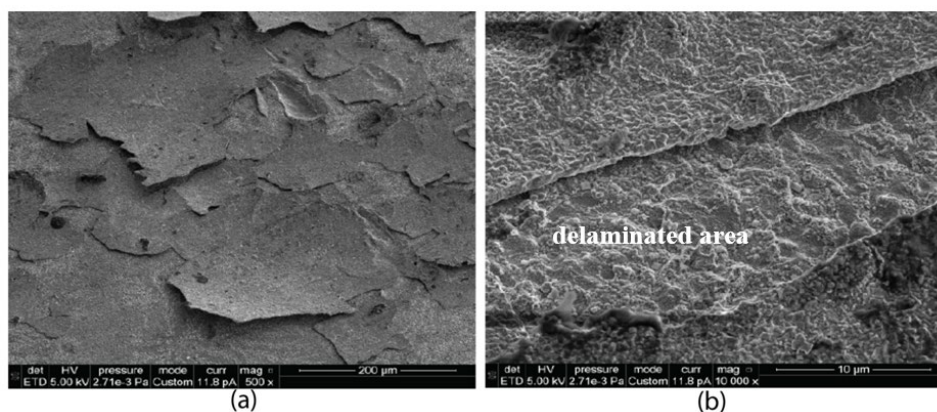

**Figure S2.** SEM morphology of the equimolar film CoCrFeMnNi sample 1HT corroded in artificial seawater: (a)  $\times 1,000$ ; (b)  $\times 10,000$ .

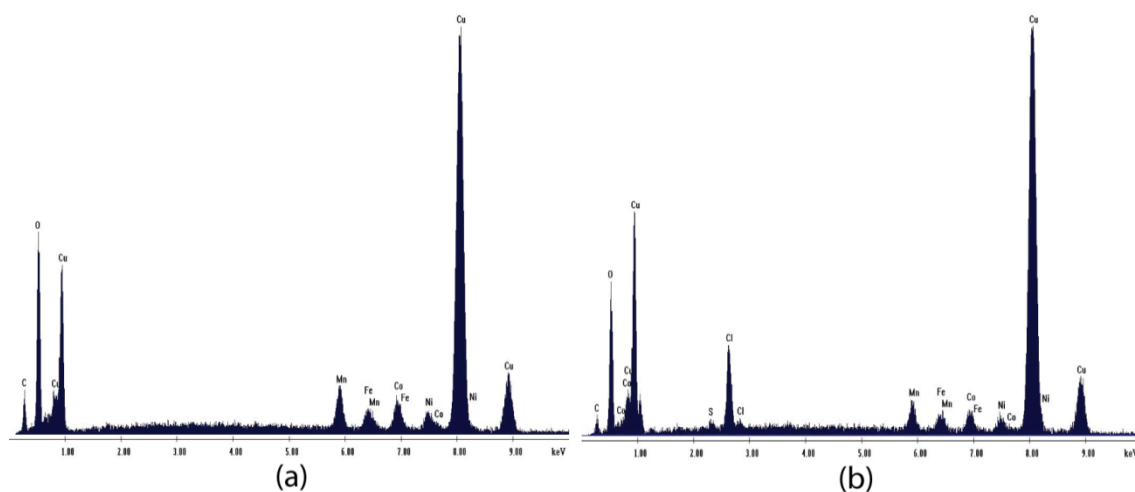

**Figure S3.** EDS spectra for the CoCrFeMnNi alloy, sample 1HT, in the initial stage (a) and after corrosion (b).

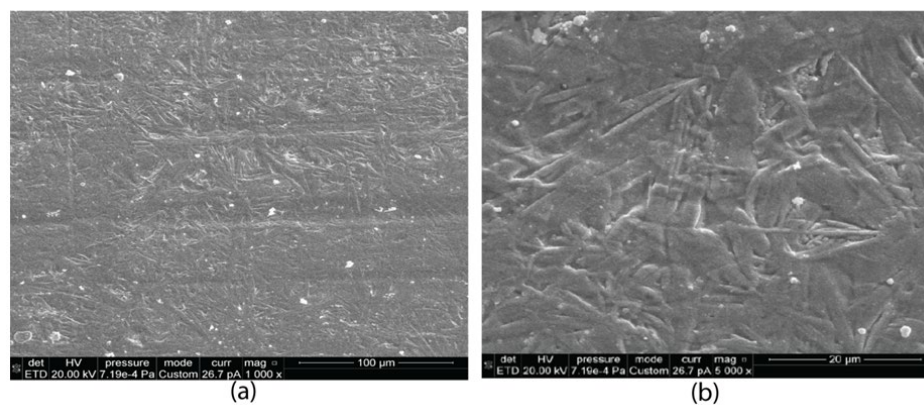

**Figure S4.** SEM morphology of the  $\text{Co}_{0.12}\text{Cr}_{0.55}\text{Fe}_{0.11}\text{Mn}_{0.1}\text{Ni}_{0.12}\text{CoCrFeMnNi}$  film, sample 2HT: (a)  $\times 1,000$ ; (b)  $\times 5,000$ .

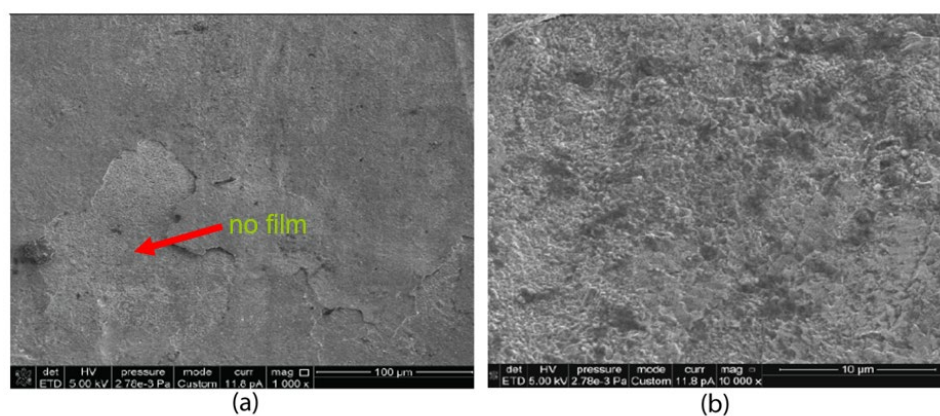

**Figure S5.** SEM morphology of the  $\text{Co}_{0.12}\text{Cr}_{0.55}\text{Fe}_{0.11}\text{Mn}_{0.1}\text{Ni}_{0.12}$  film, sample 2HT (corroded): (a)  $\times 1,000$ ; (b)  $\times 10,000$ .

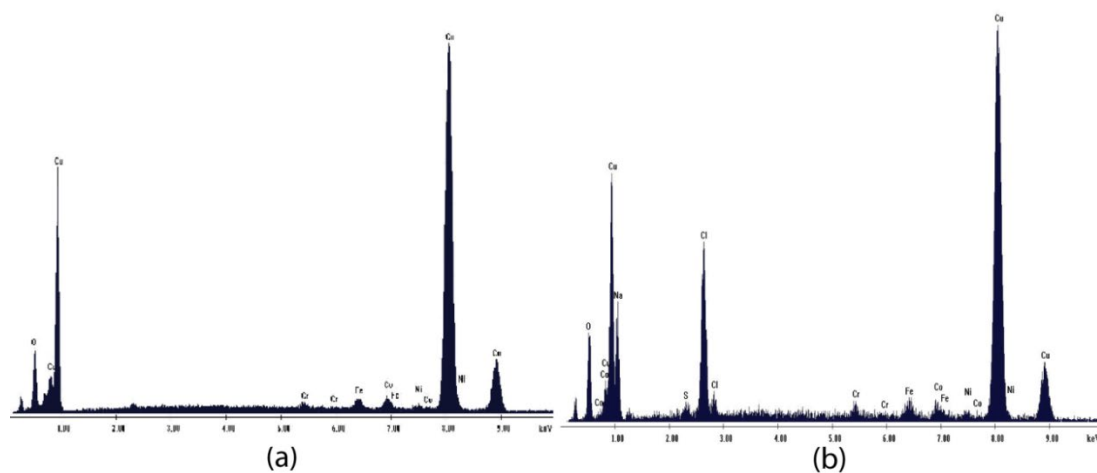

**Figure S6.** EDS spectra for of the  $\text{Co}_{0.12}\text{Cr}_{0.55}\text{Fe}_{0.11}\text{Mn}_{0.1}\text{Ni}_{0.12}$  film , sample 2HT, in the initial stage (a) and after corrosion (b).

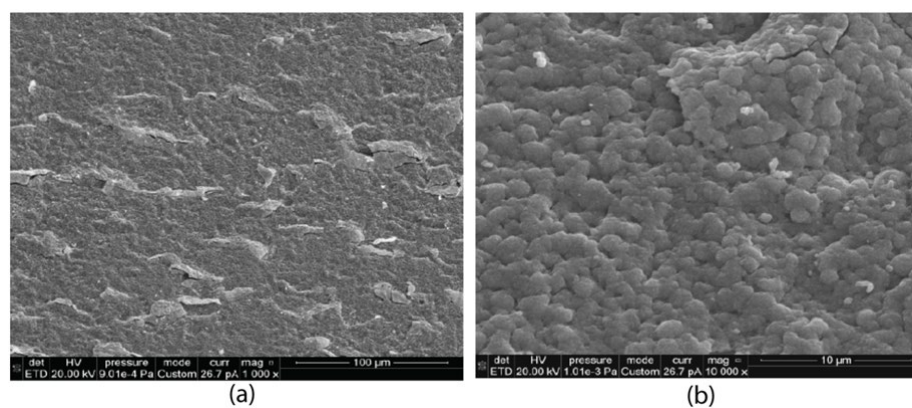

**Figure S7.** SEM morphology of the equimolar  $\text{CoCrFeMnNi}$  thin film, sample 3: (a)  $\times 1,000$ ; (b)  $\times 10,000$ .

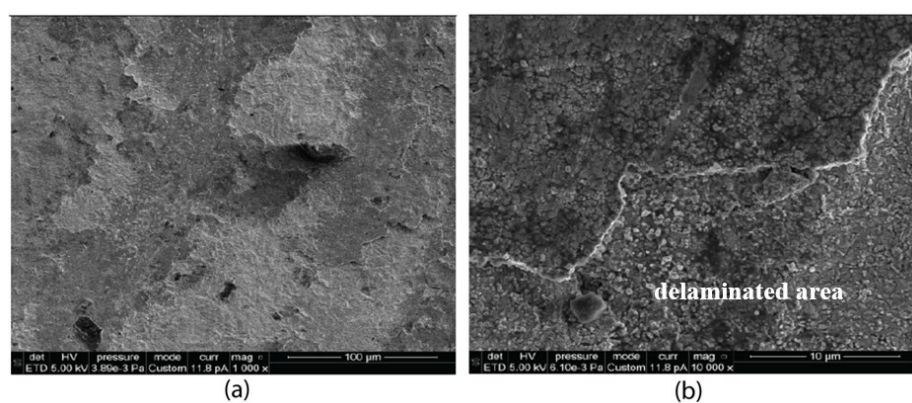

**Figure S8.** SEM morphology of the equimolar  $\text{CoCrFeMnNi}$  thin film, sample 3 (corroded): (a)  $\times 1,000$ ; (b)  $\times 10,000$ .

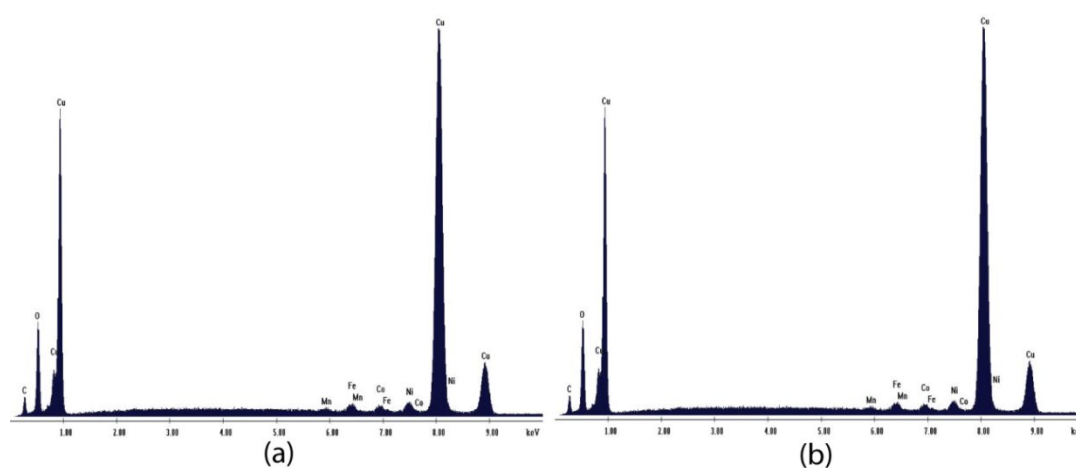

**Figure S9.** EDS spectra for the equimolar CoCrFeMnNi thin film, sample 3 in the initial stage (a) and after corrosion (b).
